# Supplementary material for: Coupled dynamics in binary mixtures of model colloidal Yukawa systems
Source: Royal Society of Chemistry journal article supplement (doi:10.1039/d4sm01123f), 2024-01-01
Supplement: d4sm01123f1.pdf [file d4sm01123f1.pdf]

## Coupled dynamics in binary mixtures of colloidal Yukawa systems

Daniel Weidig and Joachim Wagner<sup>a)</sup>

*Institut für Chemie, Universität Rostock, 18051 Rostock, Germany*

Compilation of the numerical values for the reduced long-time self-diffusion coefficient  $D_{S,\alpha}^{(L),\text{red}}$  and stretched exponential parameters, relaxation rates  $a_{\alpha\beta}$  and stretching exponent  $b_{\alpha\beta}$ , of binary Yukawa-suspensions of identically charged but differently sized species.

### I. NUMERICAL DATA

TABLE I. Reduced long-time self-diffusion coefficient  $D_S^{(L),\text{red}}$  of one-component Yukawa-suspensions in dependence on the particle diameter  $\sigma$  and number of effective charges  $Z_{\text{eff}}$  at number density  $^1\rho = 1 \times 10^{18} \text{ m}^{-3}$ .

| $Z_{\text{eff}}$ | $\sigma = 100 \text{ nm}$ | $\sigma = 50 \text{ nm}$ | $\sigma = 33 \text{ nm}$ | $\sigma = 25 \text{ nm}$ | $\sigma = 20 \text{ nm}$ |
|------------------|---------------------------|--------------------------|--------------------------|--------------------------|--------------------------|
| 300              | 0.2771 (24)               | 0.2765 (22)              | 0.2757 (25)              | 0.2749 (21)              | 0.2761 (22)              |
| 350              | 0.2193 (26)               | 0.2172 (20)              | 0.2171 (17)              | 0.2176 (18)              | 0.2175 (18)              |
| 400              | 0.1689 (23)               | 0.1687 (20)              | 0.1686 (22)              | 0.1678 (19)              | 0.1680 (15)              |
| 450              | 0.1308 (21)               | 0.1277 (15)              | 0.1272 (15)              | 0.1264 (12)              | 0.1267 (12)              |
| 500              | 0.0907 (28)               | 0.0918 (18)              | 0.0919 (17)              | 0.0919 (22)              | 0.0909 (22)              |
| 550              | 0.0638 (20)               | 0.0645 (23)              | 0.0650 (18)              | 0.0639 (16)              | 0.0640 (27)              |
| 600              | 0.0432 (14)               | 0.0435 (20)              | 0.0428 (11)              | 0.0422 (17)              | 0.0415 (20)              |

<sup>a)</sup>Electronic mail: joachim.wagner@uni-rostock.de

TABLE II. Reduced long-time self-diffusion coefficients  $D_{S,\alpha}^{(L),\text{red}}$  of binary colloidal suspensions in dependence on their number of effective charges  $Z_{\text{eff}}$ , their diameter ratio  $\sigma_A/\sigma_B$  and their number density ratio  ${}^1\rho_B/{}^1\rho_A$ . The larger species  $A$  has the diameter  $\sigma_A = 100$  nm and total number density is  ${}^1\rho_{\text{tot}} = 1 \times 10^{18} \text{ m}^{-3}$ .

| ${}^1\rho_B/{}^1\rho_A$ | $Z_{\text{eff}}$ | $\sigma_A/\sigma_B = 2$    |                            | $\sigma_A/\sigma_B = 3$    |                            | $\sigma_A/\sigma_B = 4$    |                            | $\sigma_A/\sigma_B = 5$    |                            |
|-------------------------|------------------|----------------------------|----------------------------|----------------------------|----------------------------|----------------------------|----------------------------|----------------------------|----------------------------|
|                         |                  | $D_{S,A}^{(L),\text{red}}$ | $D_{S,B}^{(L),\text{red}}$ | $D_{S,A}^{(L),\text{red}}$ | $D_{S,B}^{(L),\text{red}}$ | $D_{S,A}^{(L),\text{red}}$ | $D_{S,B}^{(L),\text{red}}$ | $D_{S,A}^{(L),\text{red}}$ | $D_{S,B}^{(L),\text{red}}$ |
| 1                       | 300              | 0.338 (6)                  | 0.216 (3)                  | 0.380 (8)                  | 0.182 (3)                  | 0.397 (5)                  | 0.1633 (18)                | 0.419 (5)                  | 0.1485 (20)                |
|                         | 350              | 0.273 (5)                  | 0.1665 (22)                | 0.303 (7)                  | 0.137 (4)                  | 0.324 (6)                  | 0.1214 (20)                | 0.342 (5)                  | 0.1100 (18)                |
|                         | 400              | 0.213 (4)                  | 0.126 (3)                  | 0.240 (4)                  | 0.1035 (25)                | 0.256 (5)                  | 0.0886 (20)                | 0.2683 (20)                | 0.0793 (15)                |
|                         | 450              | 0.167 (4)                  | 0.0952 (19)                | 0.185 (4)                  | 0.0749 (22)                | 0.195 (4)                  | 0.0641 (16)                | 0.209 (5)                  | 0.0569 (15)                |
|                         | 500              | 0.119 (4)                  | 0.0658 (21)                | 0.133 (4)                  | 0.0522 (16)                | 0.144 (4)                  | 0.0445 (12)                | 0.1511 (29)                | 0.0382 (14)                |
|                         | 550              | 0.0827 (25)                | 0.0446 (12)                | 0.0948 (27)                | 0.0358 (10)                | 0.101 (5)                  | 0.0301 (18)                | 0.1067 (22)                | 0.0257 (8)                 |
|                         | 600              | 0.0554 (29)                | 0.0298 (17)                | 0.0640 (27)                | 0.0232 (12)                | 0.0681 (28)                | 0.0193 (10)                | 0.0700 (29)                | 0.0161 (7)                 |
| 2                       | 300              | 0.365 (6)                  | 0.233 (4)                  | 0.417 (7)                  | 0.209 (4)                  | 0.451 (7)                  | 0.1941 (23)                | 0.478 (8)                  | 0.183 (3)                  |
|                         | 350              | 0.296 (6)                  | 0.182 (4)                  | 0.343 (6)                  | 0.1615 (23)                | 0.372 (7)                  | 0.1468 (25)                | 0.399 (6)                  | 0.1367 (21)                |
|                         | 400              | 0.234 (6)                  | 0.139 (3)                  | 0.273 (5)                  | 0.1203 (27)                | 0.298 (3)                  | 0.1082 (22)                | 0.325 (6)                  | 0.1018 (18)                |
|                         | 450              | 0.181 (5)                  | 0.1040 (18)                | 0.214 (5)                  | 0.0895 (26)                | 0.231 (3)                  | 0.0789 (13)                | 0.253 (7)                  | 0.0729 (13)                |
|                         | 500              | 0.130 (4)                  | 0.0727 (25)                | 0.154 (5)                  | 0.0626 (15)                | 0.174 (6)                  | 0.0554 (15)                | 0.188 (7)                  | 0.0504 (19)                |
|                         | 550              | 0.092 (4)                  | 0.0508 (16)                | 0.112 (4)                  | 0.0433 (17)                | 0.125 (6)                  | 0.0380 (13)                | 0.135 (5)                  | 0.0337 (10)                |
|                         | 600              | 0.063 (4)                  | 0.0337 (18)                | 0.074 (4)                  | 0.0278 (10)                | 0.083 (3)                  | 0.0237 (12)                | 0.090 (4)                  | 0.0215 (5)                 |
| 4                       | 300              | 0.385 (10)                 | 0.250 (4)                  | 0.458 (9)                  | 0.2341 (22)                | 0.492 (10)                 | 0.2235 (25)                | 0.537 (12)                 | 0.2168 (26)                |
|                         | 350              | 0.314 (8)                  | 0.195 (4)                  | 0.379 (7)                  | 0.1814 (21)                | 0.417 (7)                  | 0.1726 (23)                | 0.454 (8)                  | 0.1658 (20)                |
|                         | 400              | 0.250 (7)                  | 0.150 (3)                  | 0.305 (9)                  | 0.1386 (23)                | 0.340 (7)                  | 0.1290 (21)                | 0.373 (11)                 | 0.1231 (21)                |
|                         | 450              | 0.193 (5)                  | 0.1127 (16)                | 0.236 (8)                  | 0.1022 (25)                | 0.267 (10)                 | 0.0946 (17)                | 0.297 (7)                  | 0.0909 (20)                |
|                         | 500              | 0.142 (4)                  | 0.0802 (21)                | 0.178 (6)                  | 0.0732 (18)                | 0.202 (6)                  | 0.0674 (18)                | 0.225 (6)                  | 0.0633 (17)                |
|                         | 550              | 0.101 (5)                  | 0.0563 (22)                | 0.129 (6)                  | 0.0495 (13)                | 0.148 (7)                  | 0.0460 (18)                | 0.162 (6)                  | 0.0429 (15)                |
|                         | 600              | 0.067 (4)                  | 0.0361 (15)                | 0.085 (6)                  | 0.0320 (21)                | 0.098 (5)                  | 0.0292 (15)                | 0.110 (6)                  | 0.0274 (15)                |

TABLE III. Exponential decay constant  $a$  and stretching exponent  $b$  of a virtually binary mixture in dependence on the particle diameter  $\sigma$  and its number of effective charges  $Z_{\text{eff}}$  at identical number densities  ${}^1\rho_A = {}^1\rho_B = 5 \times 10^{17} \text{ m}^{-3}$ .

| $Z_{\text{eff}}$ | $\sigma = 100$ nm    |            | $\sigma = 50$ nm     |             | $\sigma = 33$ nm     |           | $\sigma = 25$ nm     |             |
|------------------|----------------------|------------|----------------------|-------------|----------------------|-----------|----------------------|-------------|
|                  | $a / \text{ms}^{-1}$ | $b$        | $a / \text{ms}^{-1}$ | $b$         | $a / \text{ms}^{-1}$ | $b$       | $a / \text{ms}^{-1}$ | $b$         |
| 300              | 0.0404 (5)           | 1.108 (10) | 0.0822 (11)          | 1.115 (7)   | 0.1245 (9)           | 1.112 (6) | 0.1635 (18)          | 1.112 (5)   |
| 350              | 0.0320 (4)           | 1.043 (6)  | 0.0642 (6)           | 1.043 (4)   | 0.0980 (8)           | 1.047 (4) | 0.1284 (10)          | 1.044 (4)   |
| 400              | 0.0243 (5)           | 0.978 (7)  | 0.0489 (4)           | 0.9791 (26) | 0.0741 (7)           | 0.981 (5) | 0.0988 (29)          | 0.978 (18)  |
| 450              | 0.01786 (23)         | 0.920 (5)  | 0.0362 (6)           | 0.920 (7)   | 0.0549 (4)           | 0.920 (4) | 0.0729 (6)           | 0.923 (22)  |
| 500              | 0.01262 (28)         | 0.864 (8)  | 0.0255 (5)           | 0.862 (4)   | 0.0395 (5)           | 0.869 (4) | 0.0518 (4)           | 0.867 (4)   |
| 550              | 0.0085 (3)           | 0.807 (14) | 0.0173 (5)           | 0.811 (7)   | 0.0261 (4)           | 0.810 (5) | 0.0348 (4)           | 0.8095 (27) |
| 600              | 0.00508 (15)         | 0.746 (10) | 0.0109 (4)           | 0.756 (8)   | 0.01651 (21)         | 0.754 (5) | 0.0216 (5)           | 0.754 (5)   |

TABLE IV. Exponential decay constant  $a$  and stretching exponent  $b$  of binary Yukawa-suspensions of identical charged but differently sized colloidal particles in dependence on the number of effective charges  $Z_{\text{eff}}$  and the ratio of the species diameters  $\sigma_A/\sigma_B$  for a ratio of the number densities  ${}^1\rho_B/{}^1\rho_A = 1$ . The total number density for all suspensions is identical  ${}^1\rho_{\text{tot}} = 1 \times 10^{18} \text{ m}^{-3}$ , the diameter of species  $A$  is constant  $\sigma_A = 100 \text{ nm}$ .

| ${}^1\rho_B/{}^1\rho_A$ | $Z_{\text{eff}}$  | $\alpha/\beta$    | $\sigma_A/\sigma_B = 2$ |            |              |              |             |              | $\sigma_A/\sigma_B = 3$ |             |             |            |    |    | $\sigma_A/\sigma_B = 4$ |    |    |  |  |  |
|-------------------------|-------------------|-------------------|-------------------------|------------|--------------|--------------|-------------|--------------|-------------------------|-------------|-------------|------------|----|----|-------------------------|----|----|--|--|--|
|                         |                   |                   | AA                      | AB         | BB           | AA           | AB          | BB           | AA                      | AB          | BB          | AA         | AB | BB | AA                      | AB | BB |  |  |  |
| 1                       | 300               | $a_{\alpha\beta}$ | 0.0472 (13)             | 0.0554 (8) | 0.0662 (8)   | 0.0515 (13)  | 0.0644 (13) | 0.0873 (13)  | 0.0535 (12)             | 0.0707 (14) | 0.1046 (21) |            |    |    |                         |    |    |  |  |  |
|                         |                   | $b_{\alpha\beta}$ | 1.177 (18)              | 1.094 (11) | 1.013 (13)   | 1.211 (15)   | 1.085 (11)  | 0.958 (6)    | 1.224 (12)              | 0.918 (8)   | 1.076 (6)   | 0.918 (8)  |    |    |                         |    |    |  |  |  |
|                         | 350               | $a_{\alpha\beta}$ | 0.0385 (7)              | 0.0433 (5) | 0.0502 (9)   | 0.0423 (8)   | 0.0510 (7)  | 0.0647 (9)   | 0.0441 (9)              | 0.0555 (7)  | 0.0752 (12) |            |    |    |                         |    |    |  |  |  |
|                         |                   | $b_{\alpha\beta}$ | 1.101 (10)              | 1.032 (6)  | 0.960 (9)    | 1.136 (11)   | 1.028 (10)  | 0.911 (9)    | 1.153 (13)              | 0.879 (10)  | 1.023 (6)   | 0.879 (10) |    |    |                         |    |    |  |  |  |
|                         | 400               | $a_{\alpha\beta}$ | 0.0297 (6)              | 0.0332 (5) | 0.0367 (10)  | 0.0335 (8)   | 0.0387 (7)  | 0.0464 (9)   | 0.0355 (10)             | 0.0423 (8)  | 0.0536 (10) |            |    |    |                         |    |    |  |  |  |
|                         |                   | $b_{\alpha\beta}$ | 1.030 (10)              | 0.970 (7)  | 0.911 (12)   | 1.066 (9)    | 0.973 (6)   | 0.871 (6)    | 1.086 (11)              | 0.971 (5)   | 0.971 (5)   | 0.847 (8)  |    |    |                         |    |    |  |  |  |
| 450                     | $a_{\alpha\beta}$ | 0.0225 (6)        | 0.0243 (10)             | 0.0264 (5) | 0.0255 (6)   | 0.0285 (6)   | 0.0328 (8)  | 0.0270 (7)   | 0.0311 (6)              | 0.0369 (6)  |             |            |    |    |                         |    |    |  |  |  |
|                         | $b_{\alpha\beta}$ | 0.966 (7)         | 0.918 (10)              | 0.867 (8)  | 0.998 (14)   | 0.918 (8)    | 0.833 (8)   | 1.007 (7)    | 0.915 (9)               | 0.811 (6)   |             |            |    |    |                         |    |    |  |  |  |
| 500                     | $a_{\alpha\beta}$ | 0.0166 (5)        | 0.0174 (4)              | 0.0184 (4) | 0.0185 (4)   | 0.0202 (4)   | 0.0221 (5)  | 0.0196 (6)   | 0.0218 (6)              | 0.0248 (6)  |             |            |    |    |                         |    |    |  |  |  |
|                         | $b_{\alpha\beta}$ | 0.910 (10)        | 0.866 (9)               | 0.823 (9)  | 0.924 (8)    | 0.864 (7)    | 0.798 (5)   | 0.933 (13)   | 0.862 (11)              | 0.782 (8)   |             |            |    |    |                         |    |    |  |  |  |
| 550                     | $a_{\alpha\beta}$ | 0.0111 (4)        | 0.0116 (5)              | 0.0121 (5) | 0.01258 (28) | 0.01338 (28) | 0.0144 (4)  | 0.0137 (3)   | 0.01468 (29)            | 0.0161 (5)  |             |            |    |    |                         |    |    |  |  |  |
|                         | $b_{\alpha\beta}$ | 0.838 (10)        | 0.811 (10)              | 0.780 (10) | 0.855 (9)    | 0.809 (7)    | 0.758 (10)  | 0.865 (8)    | 0.809 (8)               | 0.751 (10)  |             |            |    |    |                         |    |    |  |  |  |
| 600                     | $a_{\alpha\beta}$ | 0.0070 (4)        | 0.0072 (3)              | 0.0074 (4) | 0.0079 (4)   | 0.0082 (5)   | 0.0086 (6)  | 0.00863 (26) | 0.0090 (4)              | 0.0094 (4)  |             |            |    |    |                         |    |    |  |  |  |
|                         | $b_{\alpha\beta}$ | 0.773 (17)        | 0.750 (15)              | 0.728 (15) | 0.785 (14)   | 0.751 (16)   | 0.714 (19)  | 0.795 (9)    | 0.755 (9)               | 0.711 (11)  |             |            |    |    |                         |    |    |  |  |  |

TABLE V. Exponential decay constant  $a$  and stretching exponent  $b$  of binary Yukawa-suspensions of identical charged but differently sized colloidal particles in dependence on the number of effective charges  $Z_{\text{eff}}$  and the ratio of the species diameters  $\sigma_A/\sigma_B$  for a ratio of the number densities  ${}^1\rho_B/{}^1\rho_A = 2$ . The total number density for all suspensions is identical  ${}^1\rho_{\text{tot}} = 1 \times 10^{18} \text{ m}^{-3}$ , the diameter of species  $A$  is constant  $\sigma_A = 100 \text{ nm}$ .

| ${}^1\rho_B/{}^1\rho_A$ | $Z_{\text{eff}}$  | $\alpha\beta$     | $\sigma_A/\sigma_B = 2$ |              |             | $\sigma_A/\sigma_B = 3$ |             |             | $\sigma_A/\sigma_B = 4$ |             |             |
|-------------------------|-------------------|-------------------|-------------------------|--------------|-------------|-------------------------|-------------|-------------|-------------------------|-------------|-------------|
|                         |                   |                   | AA                      | AB           | BB          | AA                      | AB          | BB          | AA                      | AB          | BB          |
| 2                       | 300               | $a_{\alpha\beta}$ | 0.0504 (18)             | 0.0588 (10)  | 0.0709 (13) | 0.0559 (16)             | 0.0709 (14) | 0.0979 (14) | 0.0594 (11)             | 0.0787 (14) | 0.1210 (16) |
|                         |                   | $b_{\alpha\beta}$ | 1.196 (19)              | 1.117 (9)    | 1.038 (11)  | 1.251 (22)              | 1.122 (11)  | 0.991 (4)   | 1.268 (20)              | 1.114 (11)  | 0.954 (8)   |
|                         | 350               | $a_{\alpha\beta}$ | 0.0409 (7)              | 0.0466 (9)   | 0.0541 (11) | 0.0465 (10)             | 0.0566 (11) | 0.0733 (11) | 0.0498 (12)             | 0.0639 (9)  | 0.0901 (8)  |
|                         |                   | $b_{\alpha\beta}$ | 1.128 (11)              | 1.059 (10)   | 0.981 (9)   | 1.175 (17)              | 1.064 (11)  | 0.946 (7)   | 1.201 (10)              | 1.062 (8)   | 0.918 (8)   |
|                         | 400               | $a_{\alpha\beta}$ | 0.0330 (10)             | 0.0363 (9)   | 0.0407 (6)  | 0.0376 (9)              | 0.0442 (8)  | 0.0543 (7)  | 0.0402 (9)              | 0.0496 (9)  | 0.0653 (8)  |
|                         |                   | $b_{\alpha\beta}$ | 1.070 (16)              | 0.999 (10)   | 0.931 (6)   | 1.105 (12)              | 1.010 (6)   | 0.903 (7)   | 1.126 (13)              | 1.007 (7)   | 0.879 (5)   |
| 450                     | $a_{\alpha\beta}$ | 0.0246 (10)       | 0.0267 (15)             | 0.0292 (11)  | 0.0289 (9)  | 0.0328 (7)              | 0.0388 (8)  | 0.0320 (10) | 0.0375 (6)              | 0.0458 (8)  |             |
|                         | $b_{\alpha\beta}$ | 0.992 (17)        | 0.938 (14)              | 0.882 (11)   | 1.028 (13)  | 0.945 (10)              | 0.861 (6)   | 1.056 (14)  | 0.955 (4)               | 0.841 (7)   |             |
| 500                     | $a_{\alpha\beta}$ | 0.0181 (6)        | 0.0191 (4)              | 0.0205 (5)   | 0.0213 (6)  | 0.0237 (7)              | 0.0265 (7)  | 0.0236 (4)  | 0.02676 (24)            | 0.0311 (6)  |             |
|                         | $b_{\alpha\beta}$ | 0.929 (9)         | 0.881 (5)               | 0.837 (8)    | 0.953 (9)   | 0.890 (8)               | 0.817 (8)   | 0.979 (8)   | 0.897 (7)               | 0.804 (9)   |             |
| 550                     | $a_{\alpha\beta}$ | 0.0123 (4)        | 0.0128 (4)              | 0.0134 (5)   | 0.0149 (6)  | 0.0161 (6)              | 0.0174 (8)  | 0.0165 (5)  | 0.01802 (26)            | 0.0201 (5)  |             |
|                         | $b_{\alpha\beta}$ | 0.853 (11)        | 0.821 (6)               | 0.786 (8)    | 0.884 (11)  | 0.833 (10)              | 0.777 (12)  | 0.899 (11)  | 0.834 (5)               | 0.765 (6)   |             |
| 600                     | $a_{\alpha\beta}$ | 0.00774 (24)      | 0.00787 (27)            | 0.00807 (25) | 0.0095 (5)  | 0.0099 (5)              | 0.0104 (5)  | 0.0105 (4)  | 0.0113 (4)              | 0.0121 (5)  |             |
|                         | $b_{\alpha\beta}$ | 0.785 (17)        | 0.756 (10)              | 0.733 (9)    | 0.809 (15)  | 0.770 (13)              | 0.727 (12)  | 0.818 (12)  | 0.772 (7)               | 0.722 (9)   |             |

TABLE VI. Exponential decay constant  $a$  and stretching exponent  $b$  of binary Yukawa-suspensions of identical charged but differently sized colloidal particles in dependence on the number of effective charges  $Z_{\text{eff}}$  and the ratio of the species diameters  $\sigma_A/\sigma_B$  for a ratio of the number densities  ${}^1\rho_B/{}^1\rho_A = 4$ . The total number density for all suspensions is identical  ${}^1\rho_{\text{tot}} = 1 \times 10^{18} \text{ m}^{-3}$ , the diameter of species  $A$  is constant  $\sigma_A = 100 \text{ nm}$ .

| ${}^1\rho_B/{}^1\rho_A$ | $Z_{\text{eff}}$  | $\alpha\beta$     | $\sigma_A/\sigma_B = 2$ |             |             | $\sigma_A/\sigma_B = 3$ |              |             | $\sigma_A/\sigma_B = 4$ |             |             |
|-------------------------|-------------------|-------------------|-------------------------|-------------|-------------|-------------------------|--------------|-------------|-------------------------|-------------|-------------|
|                         |                   |                   | AA                      | AB          | BB          | AA                      | AB           | BB          | AA                      | AB          | BB          |
| 300                     | $a_{\alpha\beta}$ | $a_{\alpha\beta}$ | 0.0520 (27)             | 0.0615 (14) | 0.0748 (12) | 0.0592 (18)             | 0.0760 (18)  | 0.1072 (17) | 0.0637 (28)             | 0.0862 (11) | 0.1362 (11) |
|                         |                   | $b_{\alpha\beta}$ | 1.22 (4)                | 1.139 (10)  | 1.057 (9)   | 1.26 (29)               | 1.150 (13)   | 1.024 (8)   | 1.31 (5)                | 1.154 (9)   | 0.999 (7)   |
|                         | $a_{\alpha\beta}$ | $a_{\alpha\beta}$ | 0.0429 (14)             | 0.0489 (8)  | 0.0576 (8)  | 0.0500 (7)              | 0.0617 (8)   | 0.0818 (9)  | 0.0542 (15)             | 0.0706 (10) | 0.1034 (9)  |
|                         |                   | $b_{\alpha\beta}$ | 1.146 (15)              | 1.073 (9)   | 1.000 (7)   | 1.217 (28)              | 1.094 (9)    | 0.974 (7)   | 1.244 (22)              | 1.099 (9)   | 0.957 (5)   |
|                         | 400               | $a_{\alpha\beta}$ | 0.0345 (13)             | 0.0384 (7)  | 0.0436 (7)  | 0.0405 (15)             | 0.0488 (6)   | 0.0612 (8)  | 0.0450 (13)             | 0.0561 (10) | 0.0765 (14) |
|                         |                   | $b_{\alpha\beta}$ | 1.077 (19)              | 1.012 (10)  | 0.949 (6)   | 1.126 (19)              | 1.035 (7)    | 0.928 (4)   | 1.171 (19)              | 1.045 (8)   | 0.911 (6)   |
| 450                     | $a_{\alpha\beta}$ | 0.0263 (10)       | 0.0287 (13)             | 0.0318 (9)  | 0.0318 (10) | 0.0376 (7)              | 0.0448 (7)   | 0.0364 (11) | 0.0433 (8)              | 0.0551 (11) |             |
|                         | $b_{\alpha\beta}$ | 1.013 (20)        | 0.953 (12)              | 0.897 (6)   | 1.058 (17)  | 0.978 (10)              | 0.884 (5)    | 1.098 (18)  | 0.988 (8)               | 0.871 (6)   |             |
| 500                     | $a_{\alpha\beta}$ | 0.0195 (8)        | 0.0210 (6)              | 0.0225 (6)  | 0.0242 (7)  | 0.0271 (7)              | 0.0308 (6)   | 0.0275 (13) | 0.0318 (9)              | 0.0380 (7)  |             |
|                         | $b_{\alpha\beta}$ | 0.941 (14)        | 0.898 (10)              | 0.849 (7)   | 0.986 (14)  | 0.915 (9)               | 0.835 (6)    | 1.017 (22)  | 0.927 (10)              | 0.828 (4)   |             |
| 550                     | $a_{\alpha\beta}$ | 0.0134 (6)        | 0.0141 (4)              | 0.0149 (4)  | 0.0174 (8)  | 0.0185 (6)              | 0.0203 (6)   | 0.0195 (7)  | 0.0221 (5)              | 0.0250 (6)  |             |
|                         | $b_{\alpha\beta}$ | 0.872 (12)        | 0.834 (10)              | 0.798 (7)   | 0.914 (21)  | 0.850 (9)               | 0.788 (8)    | 0.935 (15)  | 0.864 (6)               | 0.787 (9)   |             |
| 600                     | $a_{\alpha\beta}$ | 0.0084 (4)        | 0.0089 (4)              | 0.0092 (4)  | 0.0112 (6)  | 0.0118 (4)              | 0.01253 (28) | 0.0130 (5)  | 0.0139 (6)              | 0.0152 (8)  |             |
|                         | $b_{\alpha\beta}$ | 0.788 (24)        | 0.770 (15)              | 0.744 (12)  | 0.834 (18)  | 0.790 (7)               | 0.741 (6)    | 0.847 (14)  | 0.796 (12)              | 0.738 (13)  |             |

TABLE VII. Coupling constant  $\zeta$  in dependence on the number of effective charges  $Z_{\text{eff}}$ .

| $Z_{\text{eff}}$    | 300               | 350                 | 400                 | 450                 | 500                | 550                | 600                |
|---------------------|-------------------|---------------------|---------------------|---------------------|--------------------|--------------------|--------------------|
| $\zeta \times 10^2$ | 1.28 <sub>2</sub> | 1.092 <sub>14</sub> | 0.941 <sub>13</sub> | 0.737 <sub>11</sub> | 0.555 <sub>9</sub> | 0.391 <sub>8</sub> | 0.249 <sub>7</sub> |
